# Supplementary material for: Fabrication of amorphous carbon-coated NiO nanofibers for electrochemical capacitor applications
Source: Royal Society of Chemistry journal article supplement (doi:10.1039/c3ta14900e), 2013-12-16
Supplement: c3ta14900e.pdf [file c3ta14900e.pdf]

Electronic Supplementary Information (ESI) for

## **Fabrication of Amorphous Carbon-Coated NiO Nanofibers for Electrochemical Capacitor Applications**

**Dong Hoon Shin, Jun Seop Lee, Jaemoon Jun and Jyongsik Jang \***

*World Class University (WCU) program of Chemical Convergence for Energy & Environment (C<sub>2</sub>E<sub>2</sub>), School of Chemical and Biological Engineering, College of Engineering, Seoul National University (SNU), 599 Gwanangno, Gwanak-gu, Seoul, 151-742 (Korea). Fax: +82-2-888-7295; Tel: 82-2-880-8348; e-mail: jsjang@plaza.snu.ac.kr*

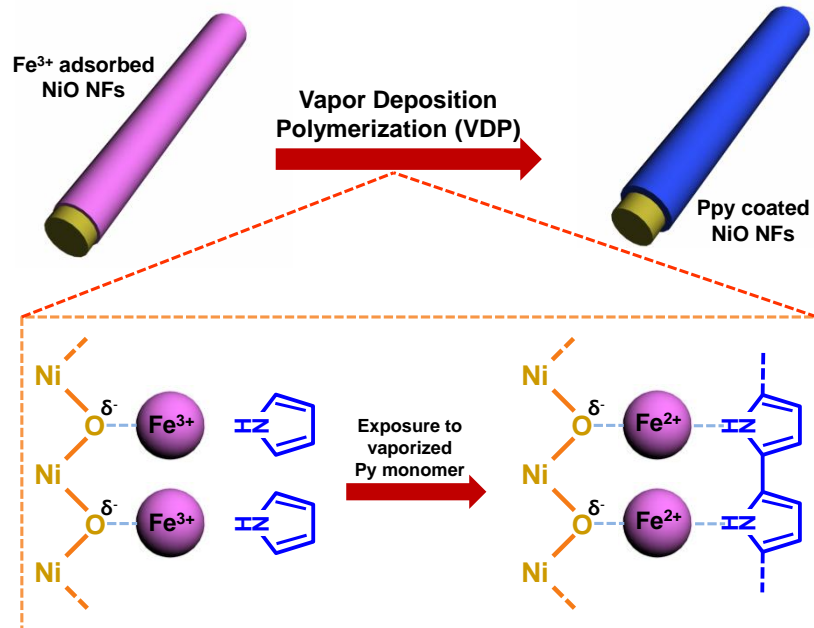

**Figure S1.** Illustration of the chemical oxidation polymerization process on the NiO NFs surfaces.

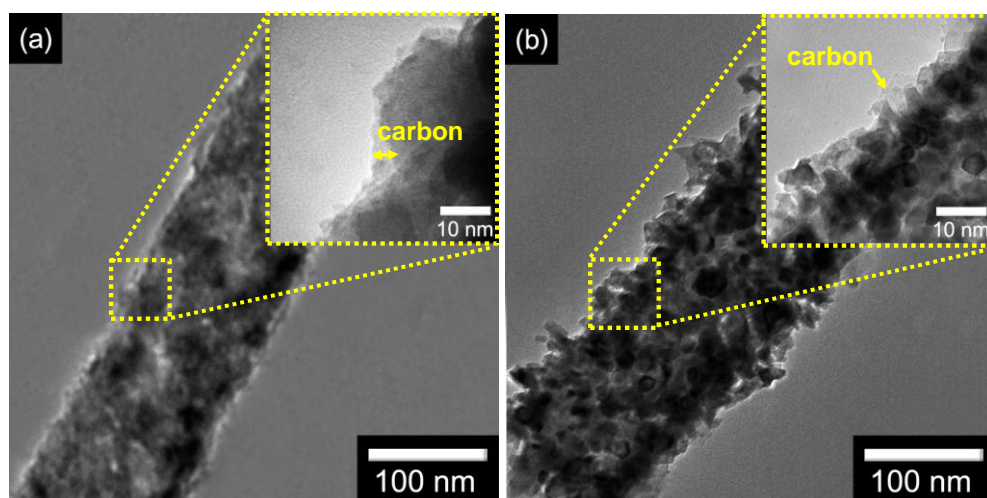

**Figure S2.** TEM and HR-TEM (inset) images of NiC NFs carbonized at (a) 500 °C and (b) 600 °C for 1 h with argon flow.

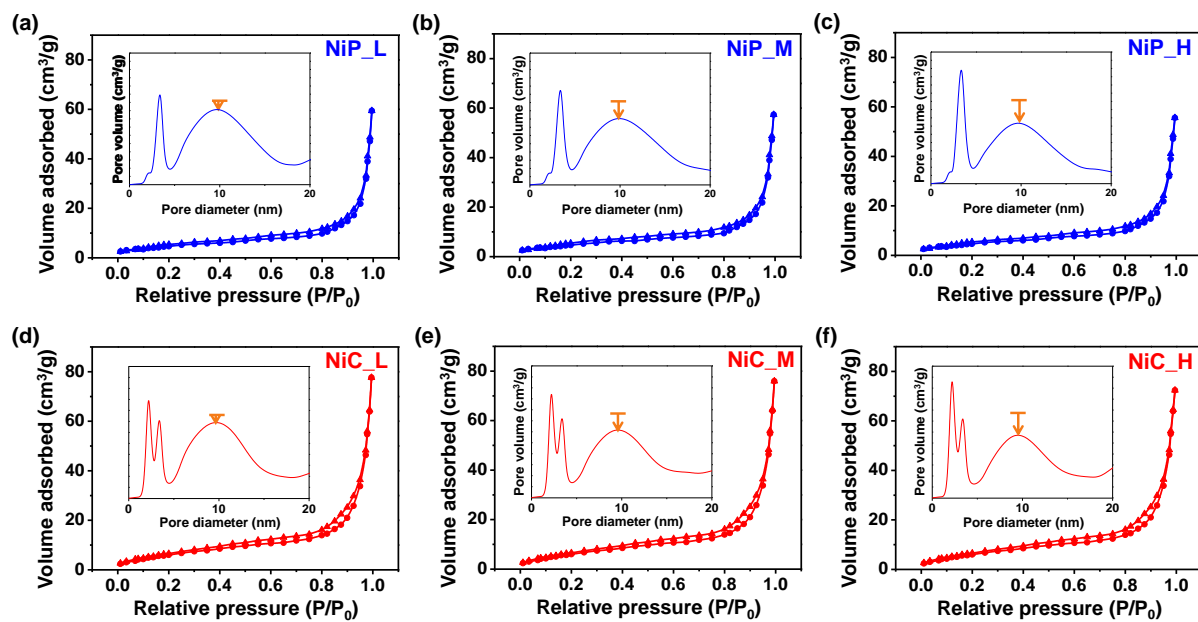

**Figure S3.** BET and BJH (inset) of polypyrrole coated NiO NFs with (a) low, (b) medium, (c) high thickness coating layer, and amorphous carbon-coated NiO NFs with (d) low, (e) medium, (f) high thickness coating layer.

**Table S1.** Coating layers thickness and surface area of each sample.

| Sample           | Coating layer thickness (nm) | Surface area (m <sup>2</sup> g <sup>-1</sup> ) |
|------------------|------------------------------|------------------------------------------------|
| Pristine NiO NFs | -                            | 118                                            |
| NiP_L            | 5                            | 136                                            |
| NiP_M            | 10                           | 123                                            |
| NiP_H            | 15                           | 117                                            |
| NiC_L            | 3                            | 144                                            |
| NiC_M            | 7                            | 130                                            |
| NiC_H            | 12                           | 124                                            |

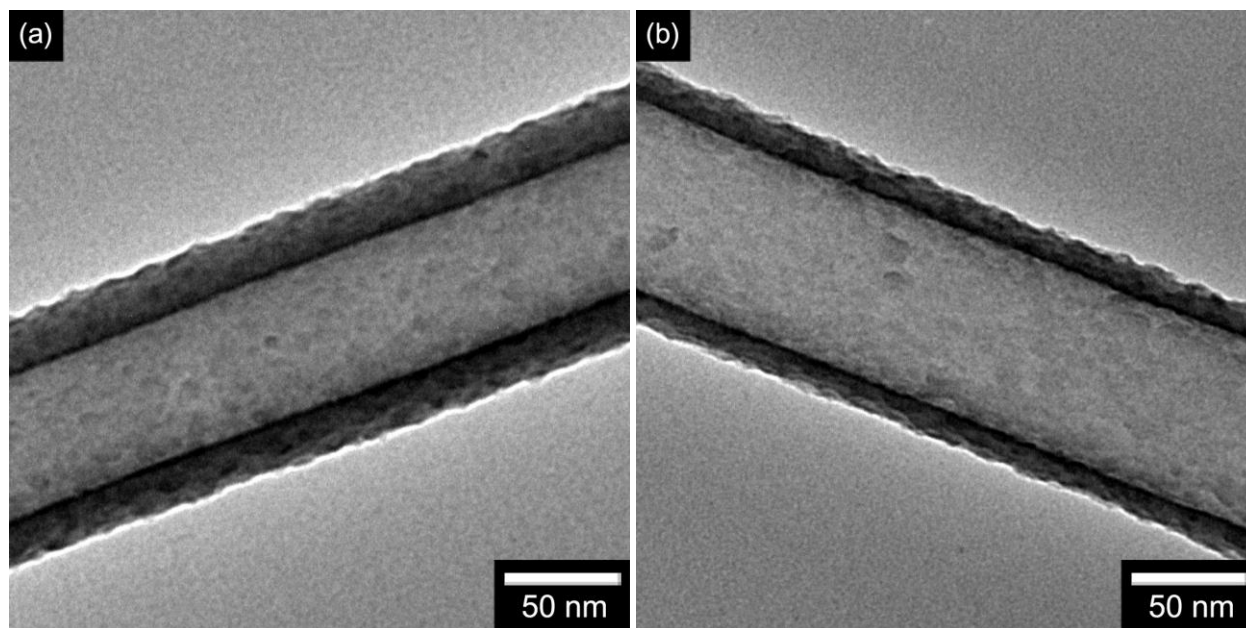

**Figure S4.** TEM images of (a) PPy NTs and (b) CNTs fabricated by hard template method.

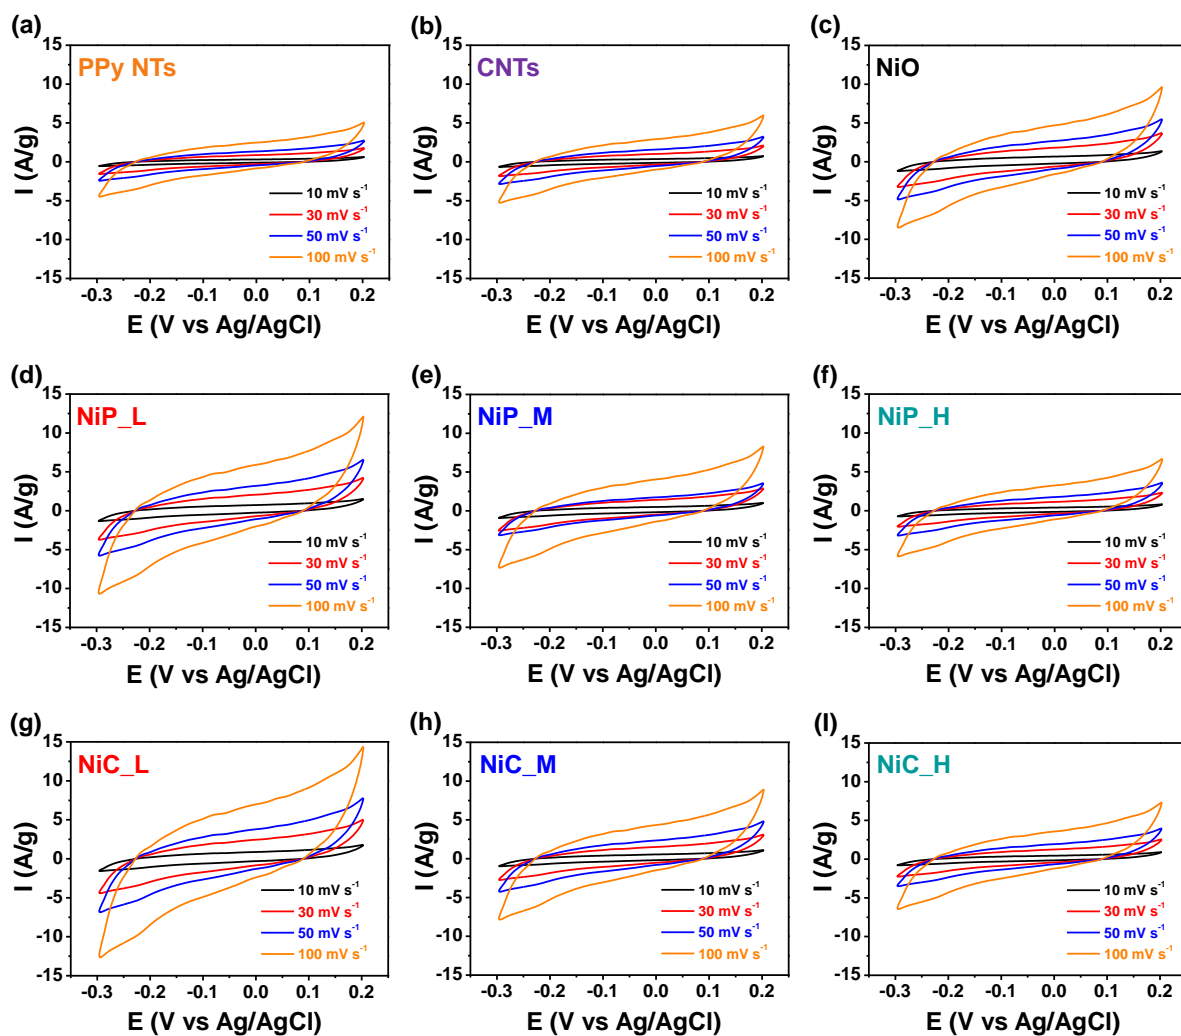

**Figure S5.** CV curves with various scan rate (10 to 100  $\text{mV s}^{-1}$ ) of (a) PPy NTs, (b) CNTs, (c) pristine NiO NFs, (d) NiP\_L, (e) NiP\_M, (f) NiP\_H, (g) NiC\_L, (h) NiC\_M and (i) NiC\_H.

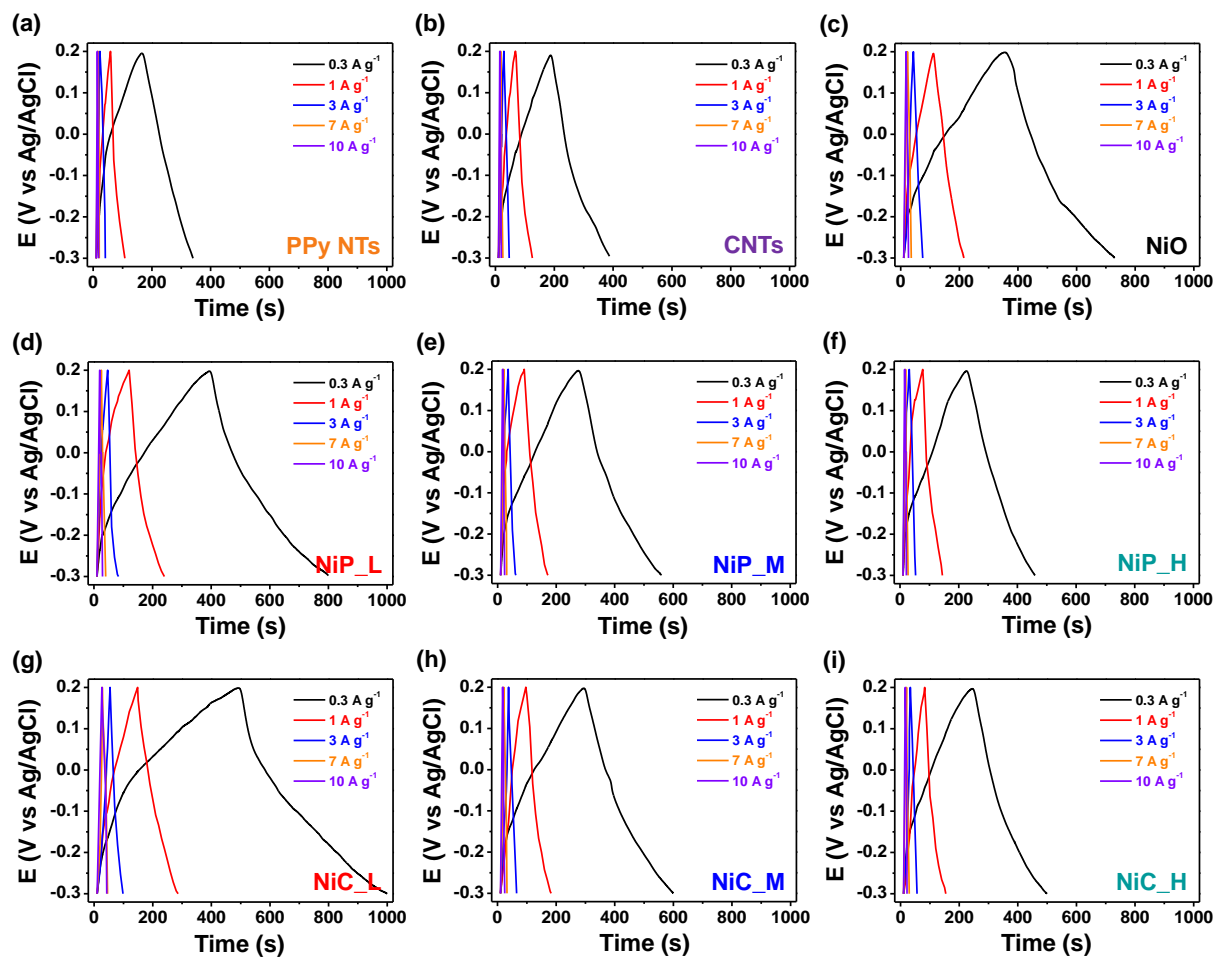

**Figure S6.** Galvanostatic charge/discharge with various current density (0.3 to 10 A g<sup>-1</sup>) of (a) PPy NTs, (b) CNTs, (c) pristine NiO NFs, (d) NiP\_L, (e) NiP\_M, (f) NiP\_H, (g) NiC\_L, (h) NiC\_M and (i) NiC\_H.



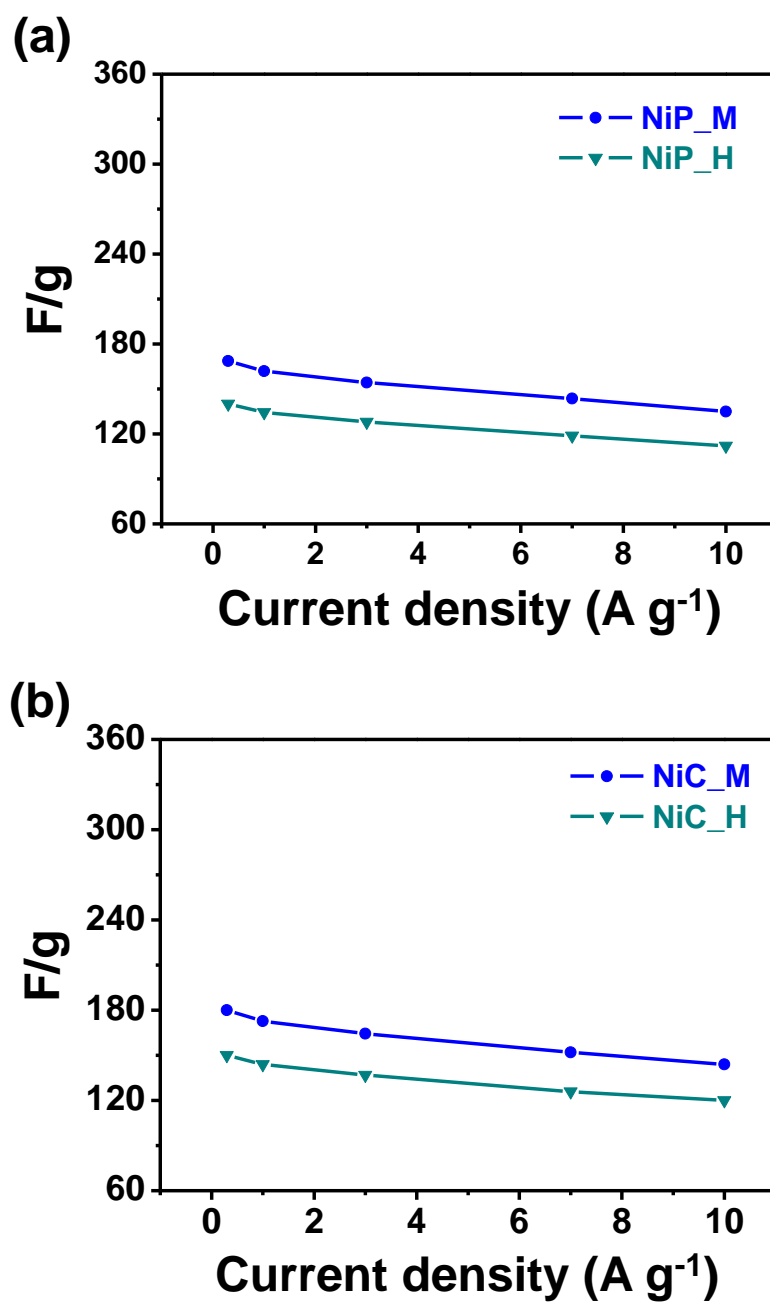

**Figure S7.** Specific capacitance of (a) NiP NFs with medium (blue) and high thickness (green) and (b) NiC NFs with medium (blue) and high thickness (green) at different current density (0.3 to 10 A g<sup>-1</sup>).

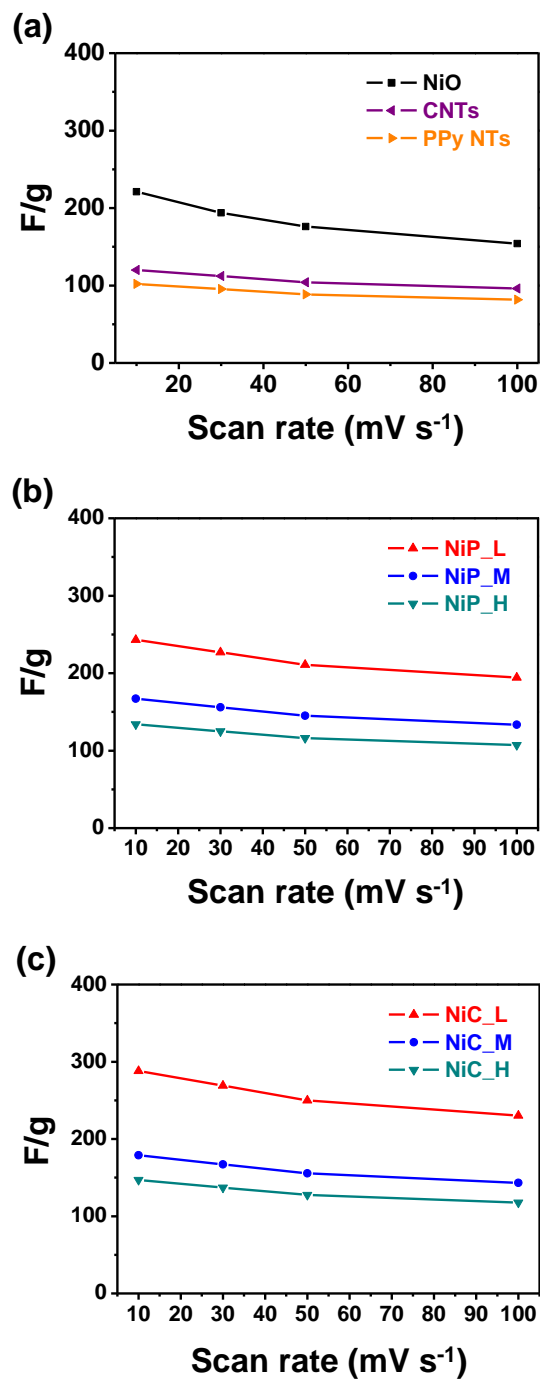

**Figure S8.** Specific capacitance of (a) pristine NiO (black), PPy NTs (orange), CNTs (purple), (b) NiP NFs and NiC NFs with different scan rate (10 to 100 mV s<sup>-1</sup>).

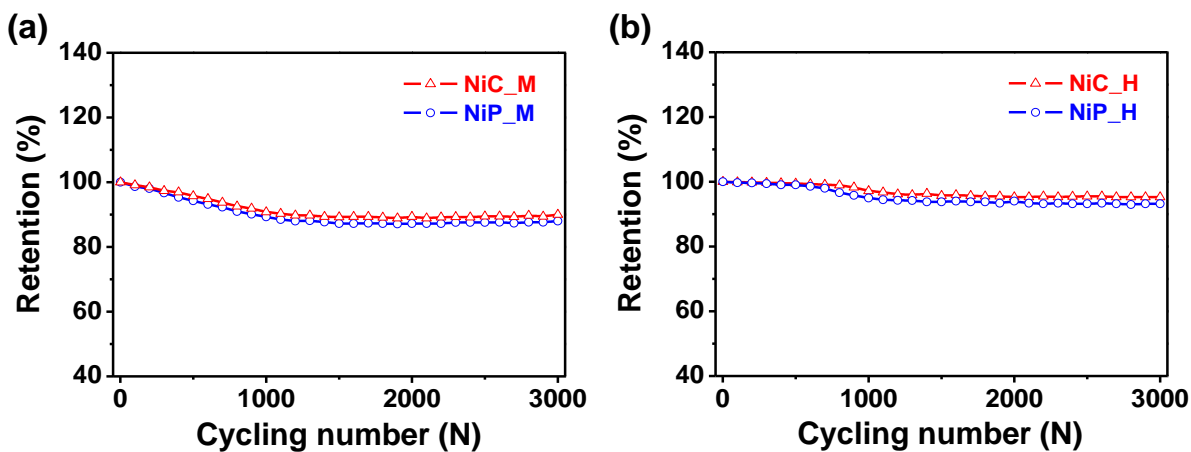

**Figure S9.** Long-life cyclic stability of (a) medium thickness coated of NiP NFs (blue) and NiC NFs (red) and (b) high thickness of coated NiP NFs (blue) and NiC NFs (red).
